# Supplementary material for: POM-based compounds modified by mono- and bis-triazole derivatives: photocatalytic, electrochemical, and supercapacitor properties
Source: Royal Society of Chemistry journal article supplement (doi:10.1039/d1ce01596f), 2022-01-01
Supplement: d1ce01596f1.pdf [file d1ce01596f1.pdf]

Supplementary Material (ESI) for *CrystEngComm*  
This journal is © The Royal Society of Chemistry

## Five POM-based compounds modified by mono- and bis-triazole derivatives: photocatalytic, electrochemical and supercapacitor properties

Xi Xu, Yanping Zhang, Jun Ying\*, Liang Jin, Aixiang Tian, Xiuli Wang\*

Table S1. Selected bond lengths (Å) and angles (°) of compounds 1–5.

### Compound 1

|                                 |            |                                  |            |
|---------------------------------|------------|----------------------------------|------------|
| Ni(1) – O(1)                    | 2.0215(16) | Ni(1) – N(1)                     | 2.0454(19) |
| Ni(1) – O(7) <sup>2</sup>       | 2.0732(16) | Ni(1) – N(2)                     | 1.388(3)   |
| O(1) – Ni(1) – O3W              | 88.76(7)   | N(1) – Ni(1) – O(7) <sup>2</sup> | 90.49(7)   |
| O1W – Ni(1) – O(7) <sup>2</sup> | 87.59(7)   | O(1) – Ni(1) – O(7) <sup>2</sup> | 92.93(7)   |
| O(1) – Ni(1) – O2W              | 174.58(7)  | O(1) – Ni(1) – N(1)              | 93.17(8)   |

Symmetry codes: #1 1-X, -Y, 1-Z #2 1-X, 1-Y, 1-Z

### Compound 2

|                     |            |                                   |            |
|---------------------|------------|-----------------------------------|------------|
| Zn(1) – O3W         | 2.1862(17) | Zn(1) – O(12)                     | 2.0815(17) |
| Zn(1) – N(1)        | 2.087(2)   | Zn(1) – O(5) <sup>2</sup>         | 2.1390(16) |
| O(12) – Zn(1) – O3W | 87.67(7)   | O(12) – Zn(1) – O(5) <sup>2</sup> | 94.10(7)   |
| O2W – Zn(1) – N(1)  | 175.18(8)  | O(12) – Zn(1) – N(1)              | 93.13(8)   |
| N(1) – Zn(1) – O3W  | 85.30(8)   | N(15) – Zn(1) – O(5) <sup>2</sup> | 89.92(7)   |

Symmetry codes: #1 1-X, 2-Y, 1-Z #2 1-X, 1-Y, 1-Z

### Compound 3

|                                |           |                                   |           |
|--------------------------------|-----------|-----------------------------------|-----------|
| Co(1) – O(12)                  | 2.089(3)  | Co(1) – O1W <sup>2</sup>          | 2.070(3)  |
| Co(1) – N(1)                   | 2.095(3)  | Co(1) – N(1) <sup>2</sup>         | 2.095(3)  |
| O1W – Co(1) – O1W <sup>2</sup> | 180.00    | O(12) <sup>2</sup> – Co(1) – N(1) | 80.10(12) |
| O(12) – Co(1) – N(1)           | 99.90(12) | O1W <sup>2</sup> – Co(1) – O(12)  | 90.85(11) |
| O1W – Co(1) – N(1)             | 89.06(13) | O1W <sup>2</sup> – Co(1) – N(1)   | 90.94(13) |

Symmetry codes: #1 -X, 1-Y, 1-Z #2 -X, 1-Y, -Z

### Compound 4

|                           |          |                           |          |
|---------------------------|----------|---------------------------|----------|
| Cu(1) – O(9) <sup>1</sup> | 2.099(3) | Cu(1) – O(5)              | 2.063(3) |
| Cu(1) – N(1)              | 1.975(5) | Cu(1) – N(2) <sup>2</sup> | 2.003(5) |

**Supplementary Material (ESI) for *CrystEngComm***  
**This journal is © The Royal Society of Chemistry**

|                                   |            |                                  |          |
|-----------------------------------|------------|----------------------------------|----------|
| Mo(3) – O(9) – Cu(1) <sup>1</sup> | 138.05(19) | Mo(1) – O(5) – Cu(1)             | 134.3(2) |
| N(2) – N(1) – Cu(1)               | 118.8(4)   | C(1) – N(1) – Cu(1)              | 132.6(4) |
| N(1) – N(2) – Cu(1) <sup>2</sup>  | 119.5(3)   | C(2) – N(2) – Cu(1) <sup>2</sup> | 133.6(4) |

Symmetry codes: #1 -X, 1-Y,2-Z #2 1-X, 1-Y, 1-Z

**Compound 5**

|                      |           |                       |           |
|----------------------|-----------|-----------------------|-----------|
| Cu(1) – O(47)        | 2.280(13) | Cu(1) – N(1)          | 2.014(15) |
| Cu(2) – O2W          | 2.059(14) | Cu(2) – N(14)         | 1.981(16) |
| Cu(3) – O1W          | 1.949(14) | Cu(3) – N(7)          | 2.001(15) |
| N(1) – Cu(1) – O(47) | 88.3(5)   | N(10) – Cu(1) – O(8)  | 77.5(7)   |
| N(8) – Cu(2) – N(14) | 175.0(7)  | N(14) – Cu(2) – O(47) | 90.0(6)   |
| N(7) – Cu(3) – N(2)  | 148.9(7)  | O(47) – Cu(3) – N(7)  | 89.5(5)   |

Symmetry codes: #1 1-X, 1-Y,2-Z #2 1-X, 1-Y, 2-Z #3 +X, 1+Y, +Z #4 -X, 2-Y, 1-Z

**Table S2.** Comparison of the properties of the POM-based compounds with several published supercapacitors.

| Electrode                                                                                                                                                                                   | Cs(F<br>g <sup>-1</sup> ) | Current<br>density<br>(A g <sup>-1</sup> ) | Current<br>collector | Ref.         |
|---------------------------------------------------------------------------------------------------------------------------------------------------------------------------------------------|---------------------------|--------------------------------------------|----------------------|--------------|
| <b>2</b> -GCE                                                                                                                                                                               | 412.77                    | 1                                          | glassy<br>carbon     | This<br>work |
| <b>3</b> -GCE                                                                                                                                                                               | 580                       | 1                                          | glassy<br>carbon     | This<br>work |
| <b>4</b> -GCE                                                                                                                                                                               | 823.09                    | 1                                          | glassy<br>carbon     | This<br>work |
| [Cu <sup>II</sup> <sub>2</sub> (C <sub>12</sub> H <sub>12</sub> N <sub>6</sub> ) <sub>4</sub> (PMo <sup>VI</sup> <sub>9</sub> Mo <sup>V</sup> <sub>3</sub> O <sub>39</sub> )]               | 154.5                     | 3                                          | glassy<br>carbon     | 1            |
| [Cu <sup>I</sup> H <sub>2</sub> (C <sub>12</sub> H <sub>12</sub> N <sub>6</sub> )(PMo <sub>12</sub> O <sub>40</sub> )]·[(C <sub>6</sub> H <sub>15</sub> N)(H <sub>2</sub> O) <sub>2</sub> ] | 249.0                     | 3                                          | glassy<br>carbon     | 1            |
| H <sub>3</sub> [Cu <sub>2</sub> (4-dpye) <sub>2</sub> (PMo <sub>12</sub> O <sub>40</sub> )]                                                                                                 | 260.0                     | 0.5                                        | carbon<br>cloth      | 2            |
| H[Cu <sub>2</sub> (4-Hdpye) <sub>2</sub> (PMo <sub>12</sub> O <sub>40</sub> )(H <sub>2</sub> O) <sub>4</sub> ]·2H <sub>2</sub> O                                                            | 196.6                     | 0.5                                        | carbon<br>cloth      | 2            |
| [PMo <sup>VI</sup> <sub>9</sub> Mo <sup>V</sup> <sub>3</sub> O <sub>40</sub> ]Cu <sup>I</sup> <sub>5</sub> [4-atrz] <sub>6</sub> ·H <sub>2</sub> O                                          | 237.1                     | 1                                          | glassy<br>carbon     | 3            |
| [HPW <sup>VI</sup> <sub>9</sub> W <sup>V</sup> <sub>3</sub> O <sub>40</sub> ]Cu <sup>I</sup> <sub>5</sub> [4-atrz] <sub>6</sub>                                                             | 147.5                     | 1                                          | glassy<br>carbon     | 3            |
| [H <sub>2</sub> SiMo <sup>VI</sup> <sub>9</sub> Mo <sup>V</sup> <sub>3</sub> O <sub>40</sub> ]Cu <sup>I</sup> <sub>5</sub> [4-atrz] <sub>6</sub> ·H <sub>2</sub> O                          | 232.5                     | 1                                          | glassy<br>carbon     | 3            |
| (H <sub>2</sub> bipy) <sub>1.5</sub> [Cu <sup>I</sup> (bipy)(C <sub>6</sub> H <sub>5</sub> PO <sub>3</sub> ) <sub>2</sub> Mo <sub>5</sub> O <sub>15</sub> ]·H <sub>2</sub> O                | 70.3                      | 2                                          | glassy<br>carbon     | 4            |
| [Cu <sup>II</sup> <sub>2</sub> (bipy)(H <sub>2</sub> O) <sub>4</sub> (C <sub>6</sub> H <sub>5</sub> PO <sub>3</sub> ) <sub>2</sub> Mo <sub>5</sub> O <sub>15</sub> ]                        | 160.9                     | 2                                          | glassy<br>carbon     | 4            |
| [H(C <sub>10</sub> H <sub>10</sub> N <sub>2</sub> )Cu <sub>2</sub> ][PMo <sub>12</sub> O <sub>40</sub> ]                                                                                    | 287                       | 1                                          | glassy<br>carbon     | 5            |
| (C <sub>10</sub> H <sub>10</sub> N <sub>2</sub> )Cu <sub>2</sub> ][PW <sub>12</sub> O <sub>40</sub> ]                                                                                       | 153.43                    | 1                                          | glassy<br>carbon     | 5            |

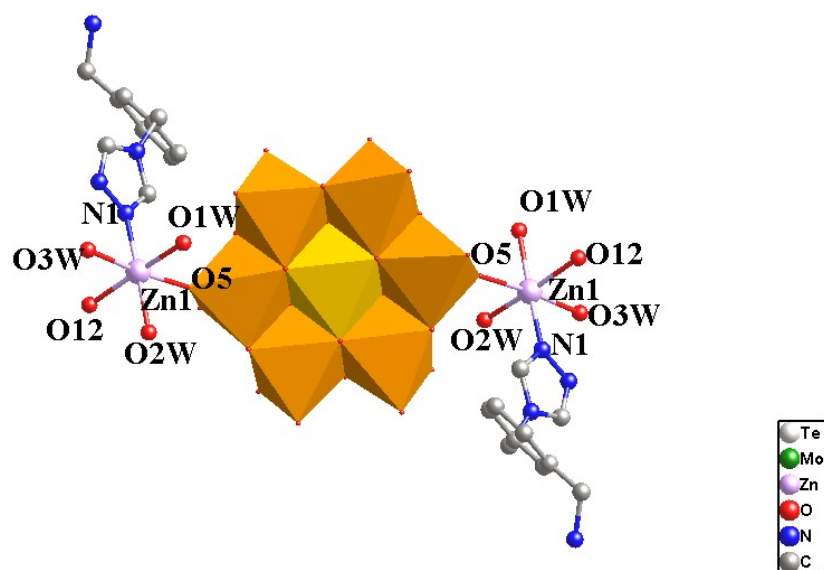

**Fig. S1.** Polyhedral/ball/stick view of the unit of compound **2**. The hydrogen atoms are omitted for clarity.

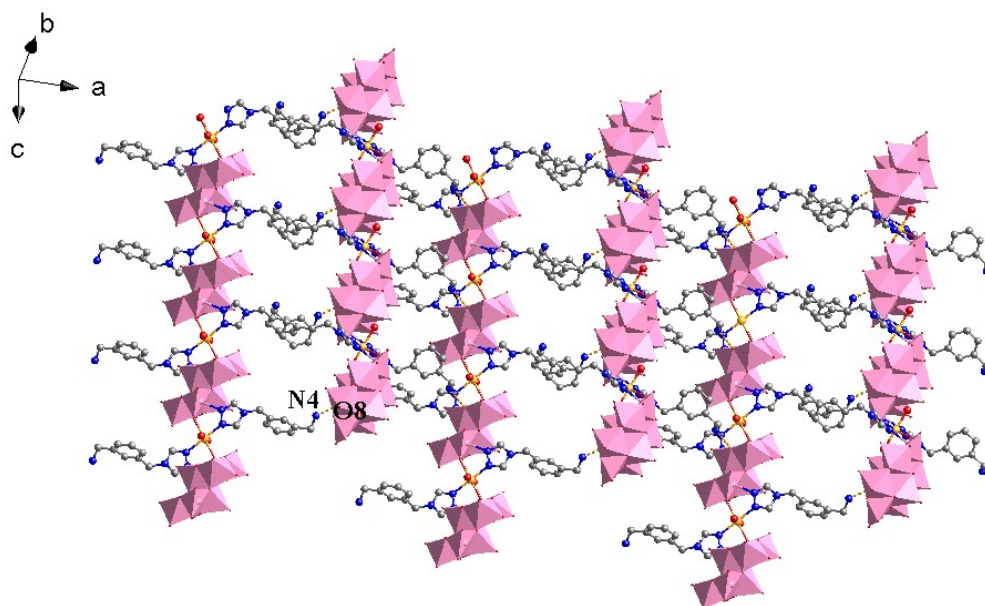

**Fig. S2.** The supramolecular 2D layer of **3** through the hydrogen bonding interactions of N4···O8 (2.863 Å).

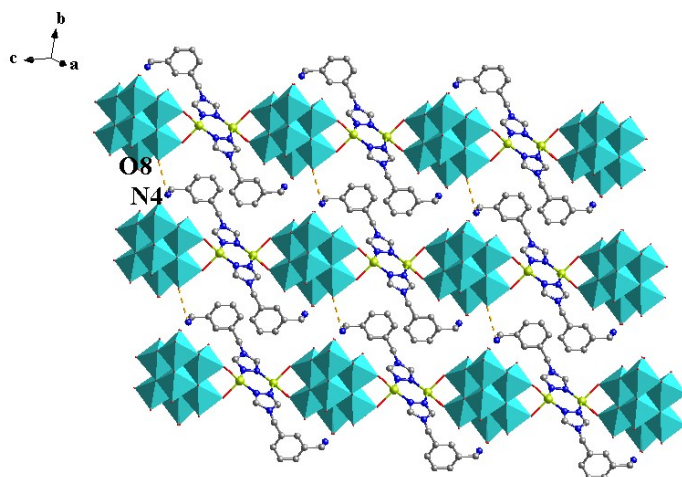

**Fig. S3.** The supramolecular 2D layer of **4** through the hydrogen bonding interactions.

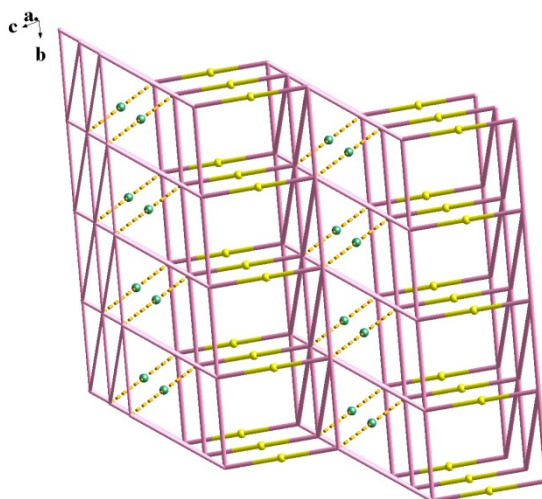

**Fig. S4.** The supramolecular 2D layer of **5** with dissociative  $PW_{12}$  anions dispersing between adjacent layers.

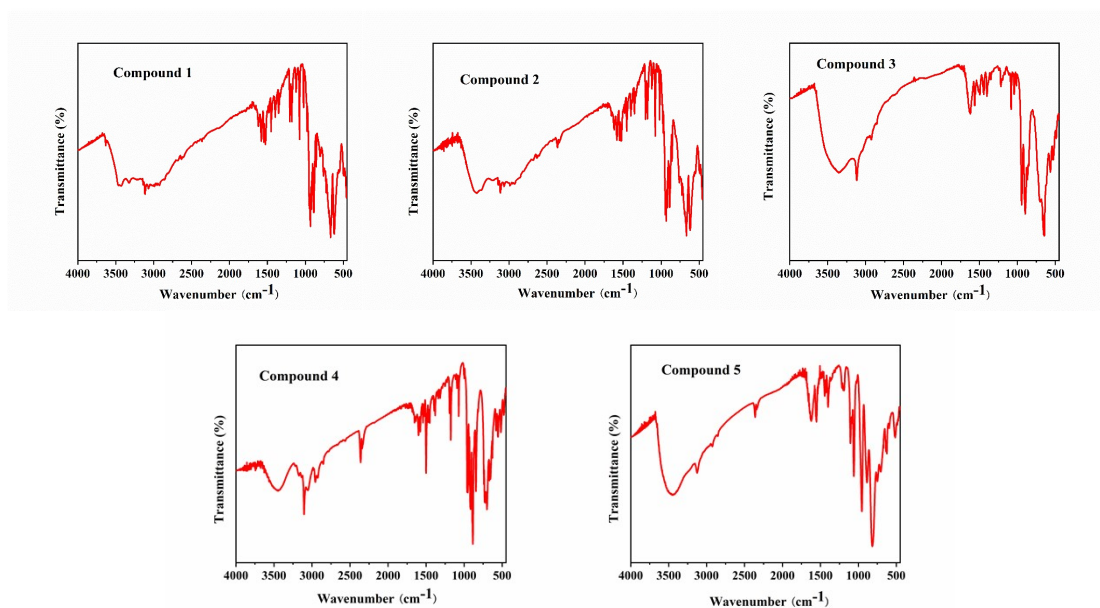

Fig. S5. The IR spectra of compounds 1–5.

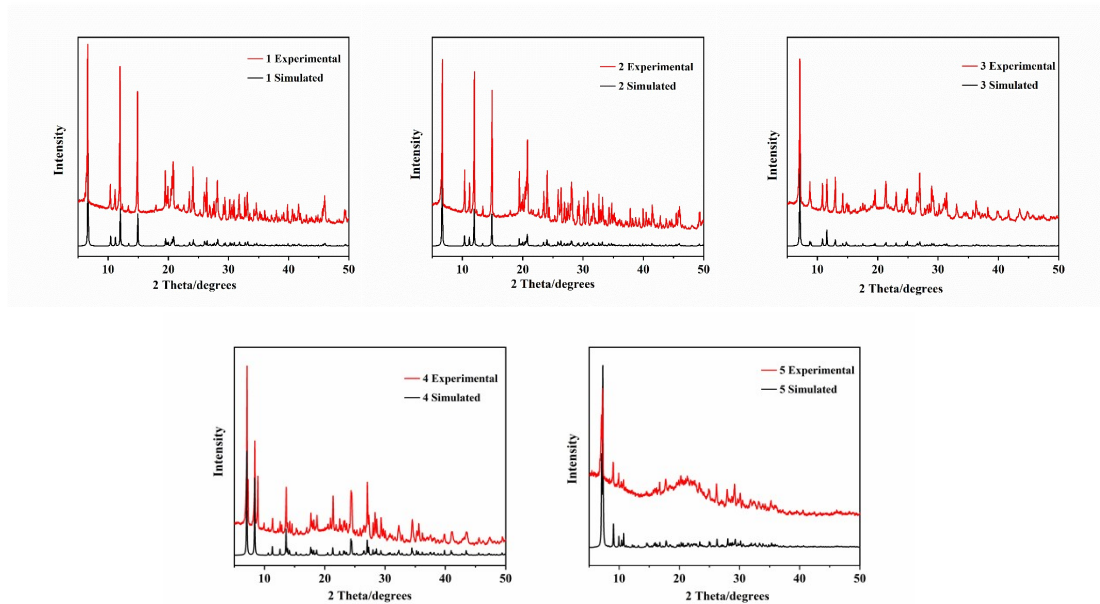

Fig. S6. The PXRD patterns of compounds 1–5.

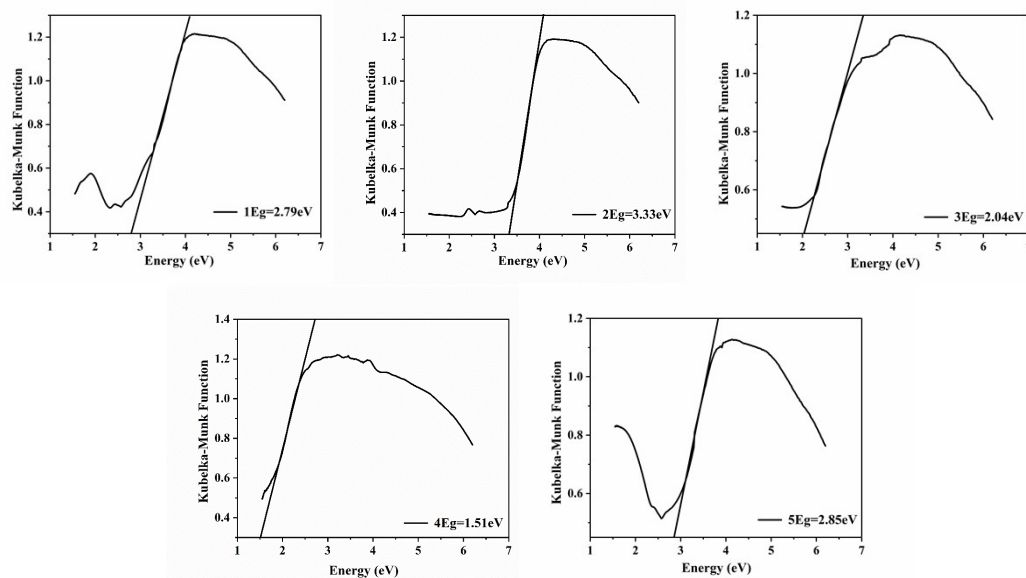

Fig. S7. The solid-state optical diffuse-reflectance spectra of compounds 1–5.

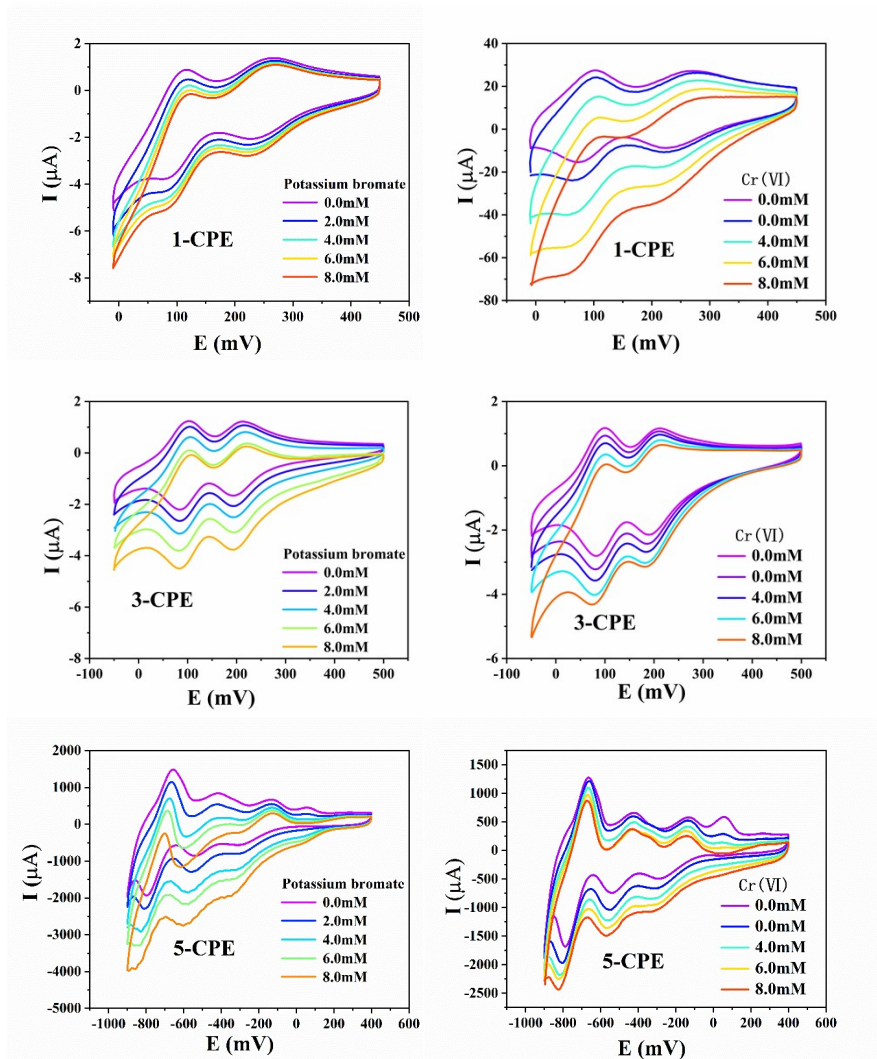

Fig. S8. Cyclic voltammograms of 1–, 3– and 5–CPEs in 0.1 M H<sub>2</sub>SO<sub>4</sub> + 0.5M

Na<sub>2</sub>SO<sub>4</sub> aqueous solution containing 0–8 mM KBrO<sub>3</sub>/Cr(VI). Scan rate: 200 mV s<sup>-1</sup>.

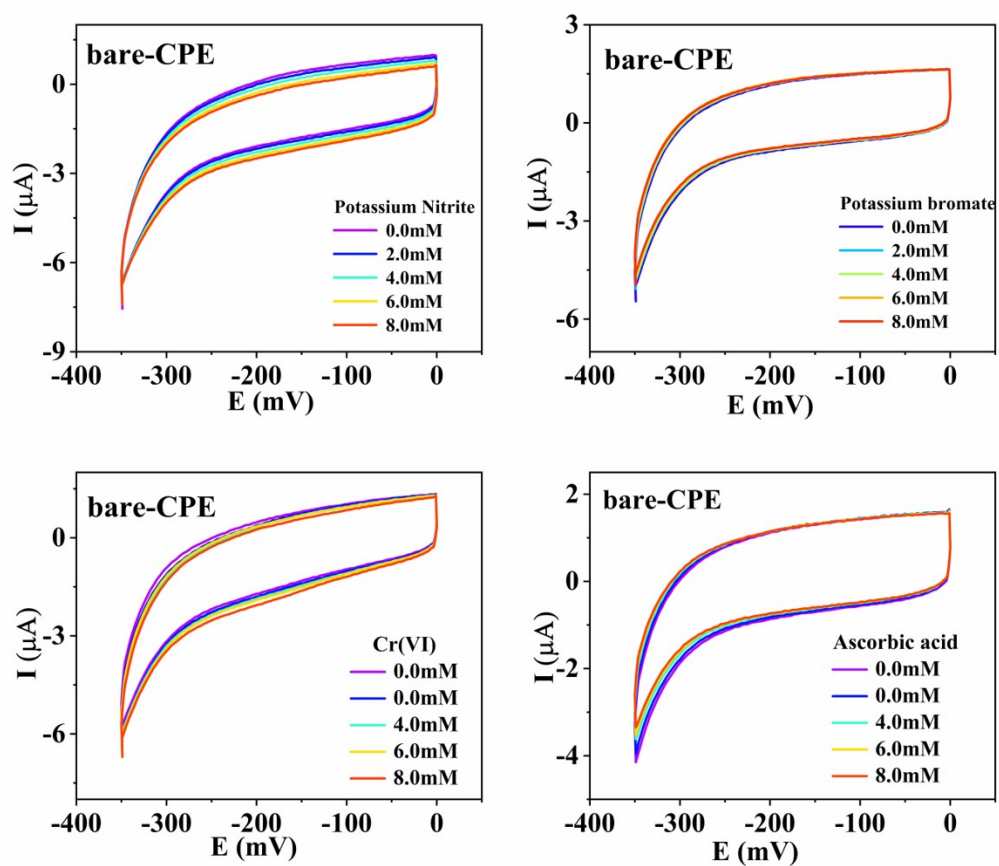

**Fig. S9.** Cyclic voltammograms of bare-CPE in 0.1 M H<sub>2</sub>SO<sub>4</sub> + 0.5M Na<sub>2</sub>SO<sub>4</sub> aqueous solution containing 0–8 mM KNO<sub>2</sub>/KBrO<sub>3</sub>/Cr(VI)/AA. Scan rate: 200 mV s<sup>-1</sup>.



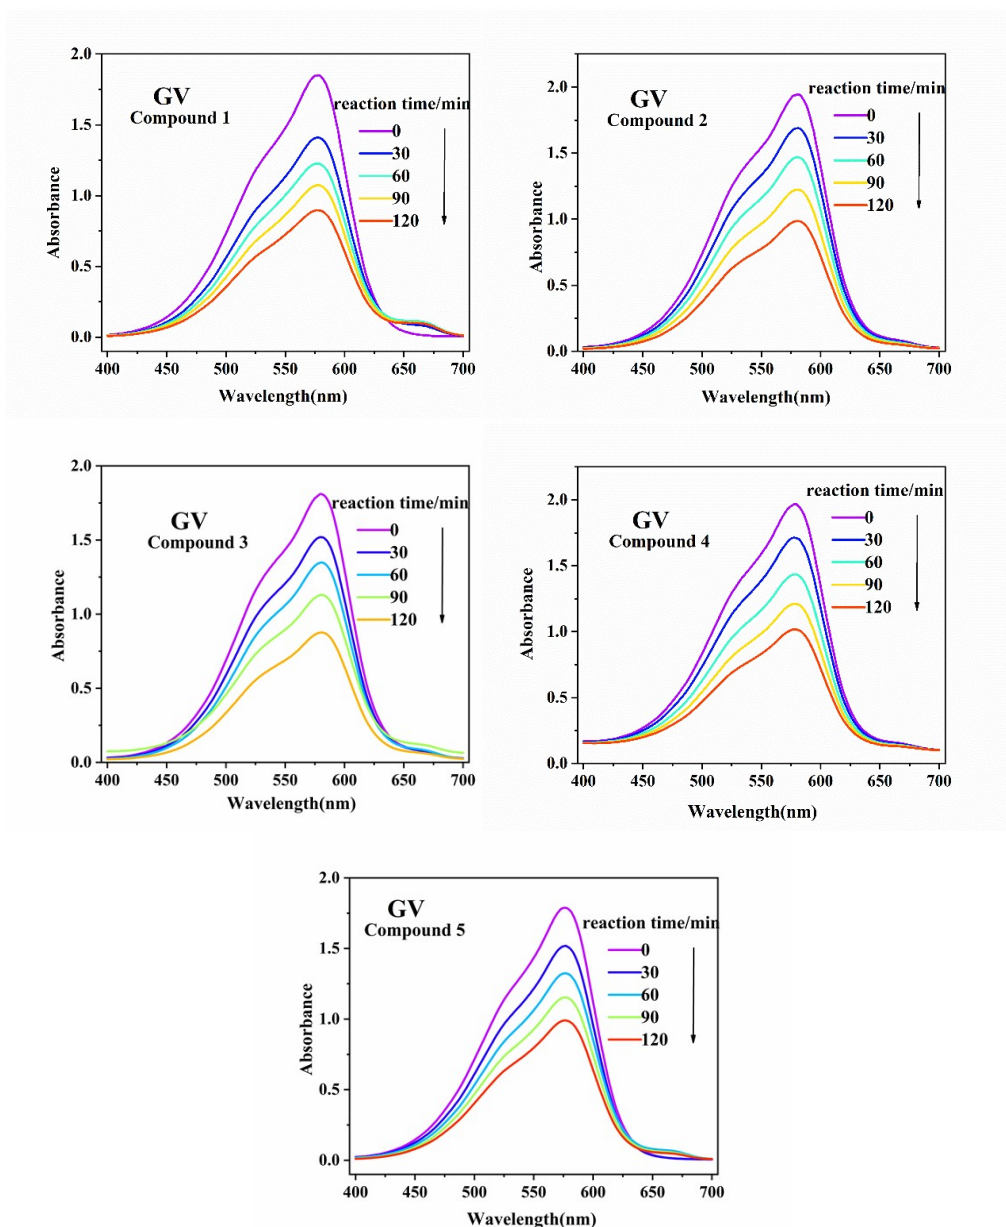

**Fig. S10.** The absorption spectra of GV solution during the decomposition reaction under UV irradiation with compounds 1–5 as catalysts.

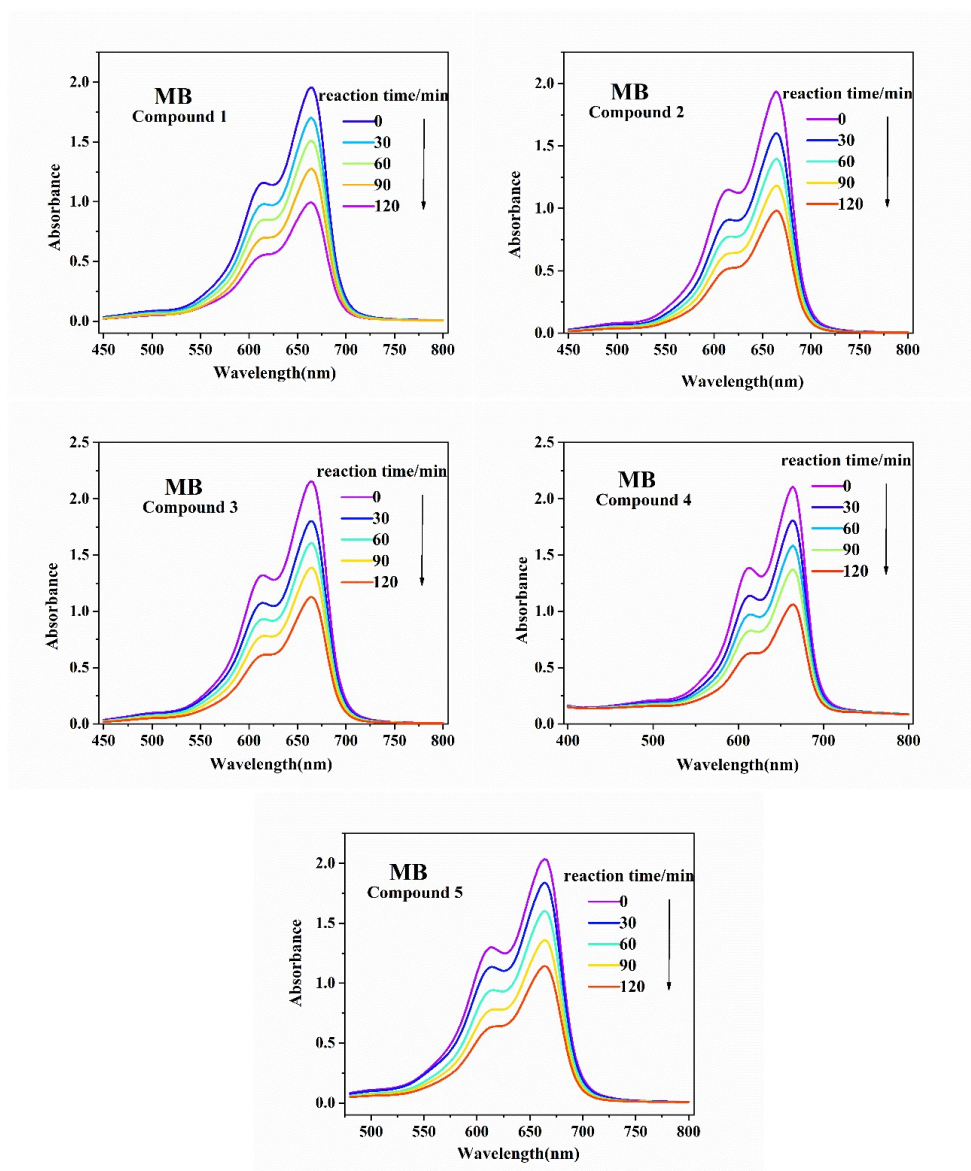

**Fig. S11.** The absorption spectra of MB solution during the decomposition reaction under UV irradiation with compounds 1–5 as catalysts.

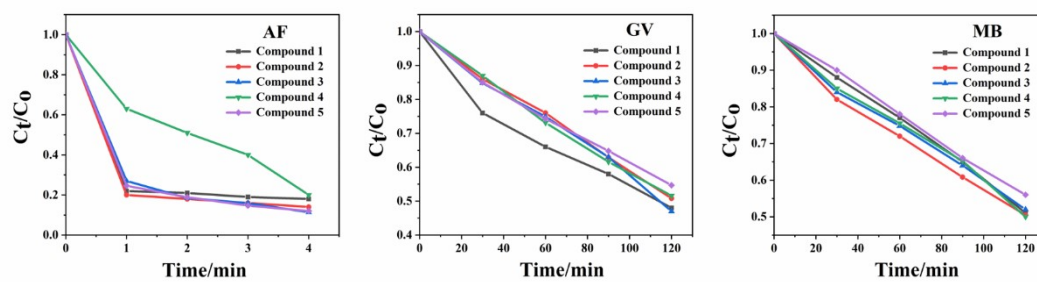

**Fig. S12.** The catalytic conversion curves of compounds 1–5.

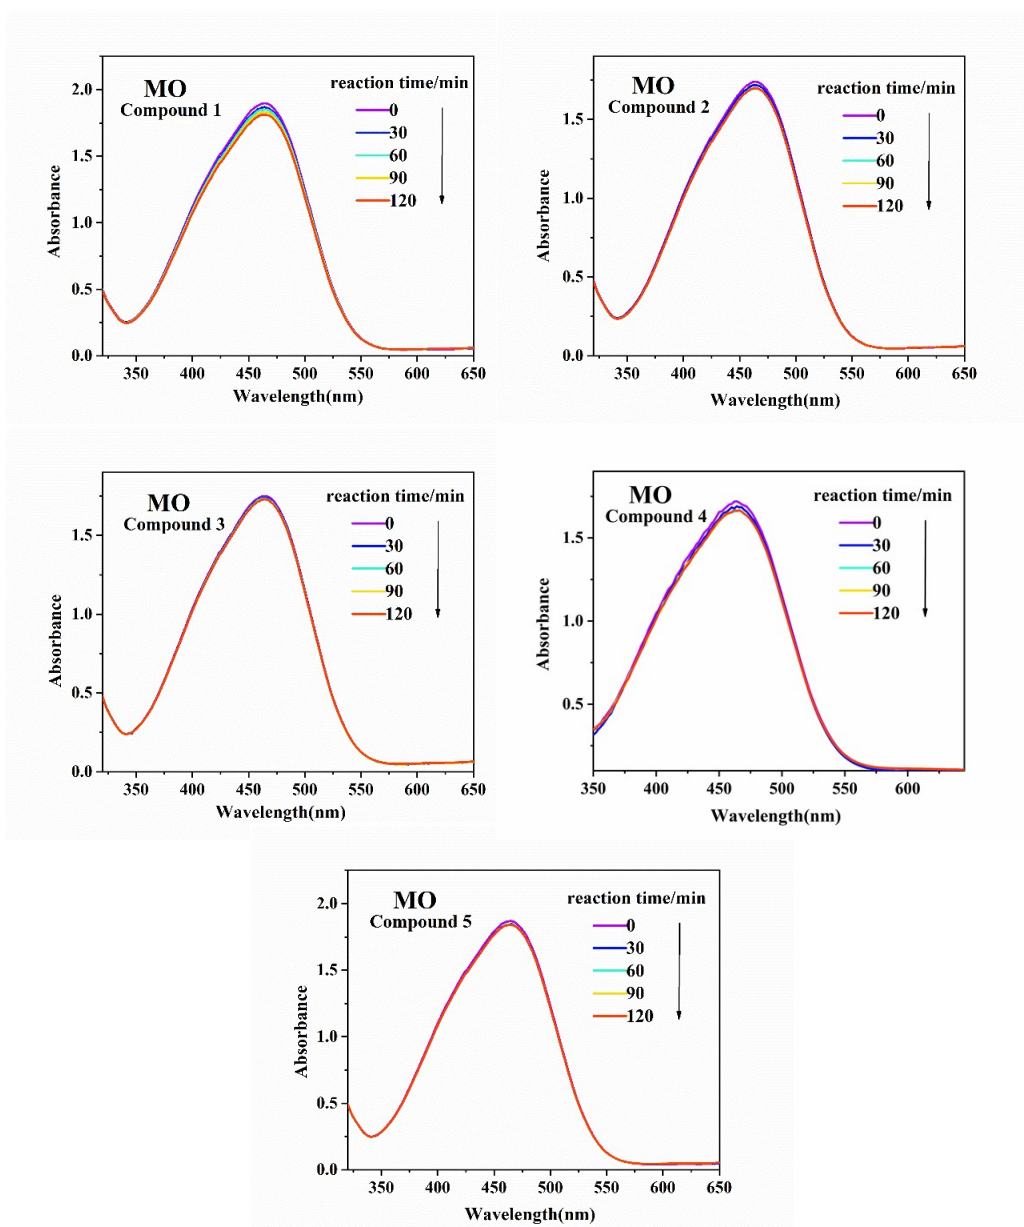

**Fig. S13.** The absorption spectra of MO solution during the decomposition reaction under UV irradiation with compounds 1-5 as catalysts.

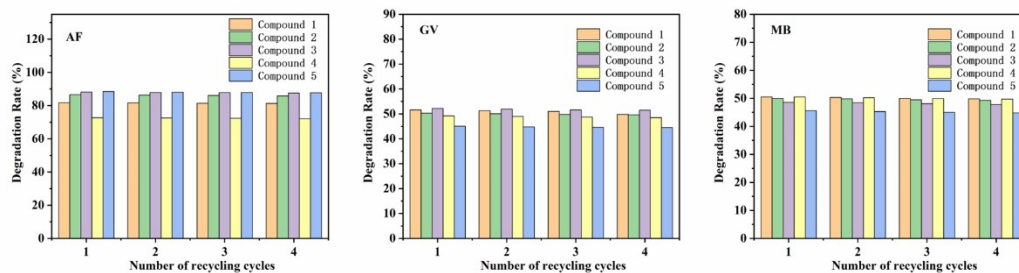

**Fig. S14.** Four cycles of photocatalytic degradation of compounds 1-5.

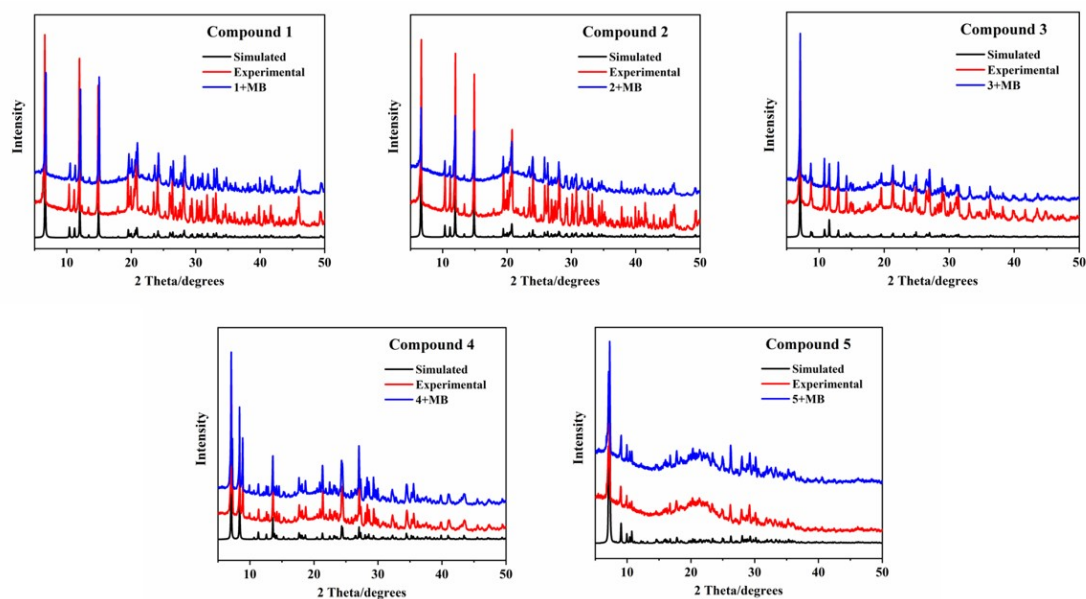

Fig. S15. The PXRD spectra of compounds 1–5.

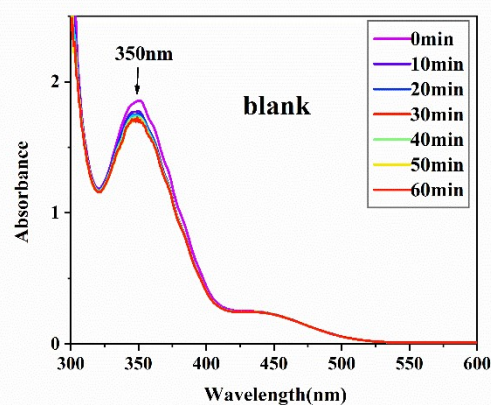

Fig. S16. The UV spectra of the Cr(VI) solution without compounds as the photoreduction catalysts.

### Notes and references

- 1 D. F. Chai, J. J. Xin, B. Li, H. J. Pang, H. Y. Ma, K. Q. Li, B. X. Xiao, X. M. Wang and L. C. Tan, *Dalton Trans.*, 2019, **48**, 13026.
- 2 Q. Q. Liu, X. L. Wang, H. Y. Lin, Z. H. Chang, Y. C. Zhang, Y. Tian, J. J. Lu and L. Yu, *Dalton Trans.*, 2021, **50**, 9450
- 3 M. L. Yang, S. Rong, X. M. Wang, H. Y. Ma, H. J. Pang, L. C. Tan, Y. X. Jiang and K. Q. Gao, *ChemNanoMat*, 2021, **7**, 299
- 4 B. R. Lu, S. B. Li, J. Pan, L. Zhang, J. J. Xin, Y. Chen and X. G. Tan, *Inorg. Chem.*, 2020, **59**, 1702
- 5 S. Roy, V. Vemuri, S. Maiti, K. S. Manoj, U. Subbarao and S. C. Peter, *Inorg. Chem.*, 2018, **57**, 12078
